# Supplementary material for: Inflammation-Related IL1β/IL1R Signaling Promotes the Development of Asbestos-Induced Malignant Mesothelioma
Source: Oxford University Press journal article supplement (doi:10.1158/1940-6207.capr-15-0347), 2016-03-02
Supplement: 19406207capr150347-sup-155769_1_data_set_3332545_n1q6nd.docx [file 19406207capr150347-sup-155769_1_data_set_3332545_n1q6nd.docx]

**Disclosure of Potential Conflicts of Interest:** The authors have no potential conflicts of interest to disclose with regard to this work.
